# Supplementary material
Source: PubMed Central journal article supplement (PMC4086660)
Supplement: NIHMS563160-supplement-01.pdf [file NIHMS563160-supplement-01.pdf]

Type of file: figure

Label: Supplemental data

Filename: figs\_1\_to\_6.pdf

**Loss of PTEN is associated with aggressive behavior in ERG positive prostate cancer**Katri A. Leinonen *et al.*

## SUPPLEMENTARY FIGURES

**Supplementary Figure 1.** Representative (A, C, E and G) negative and (B, D, F and H) positive IHC images of ERG, AR, PTEN and SPINK1 staining.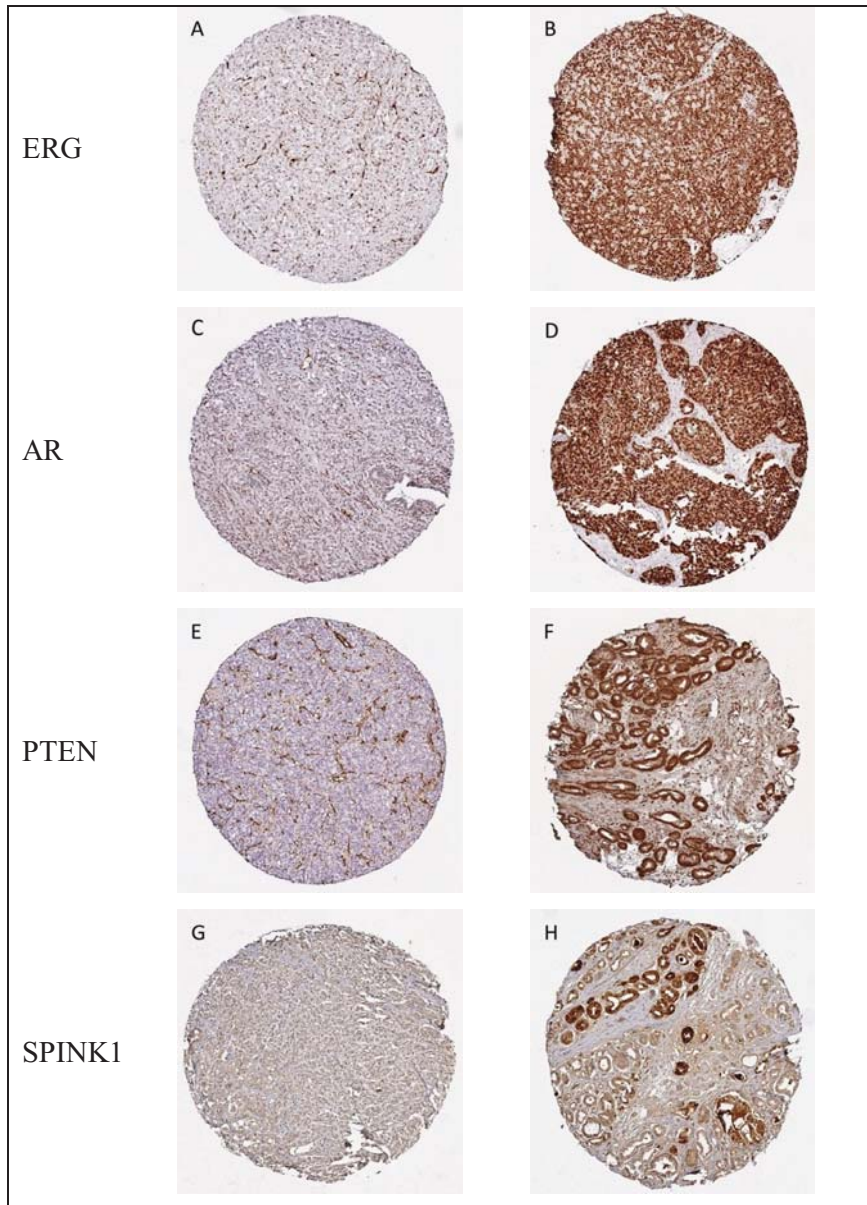

**Supplementary Figure 2.** Kaplan-Meier analysis of progression-free survival of prostatectomy-treated patients. (A) Previously used (Saramäki *et al.*, 2008) prostatectomy material, and (B) new prostatectomy samples.

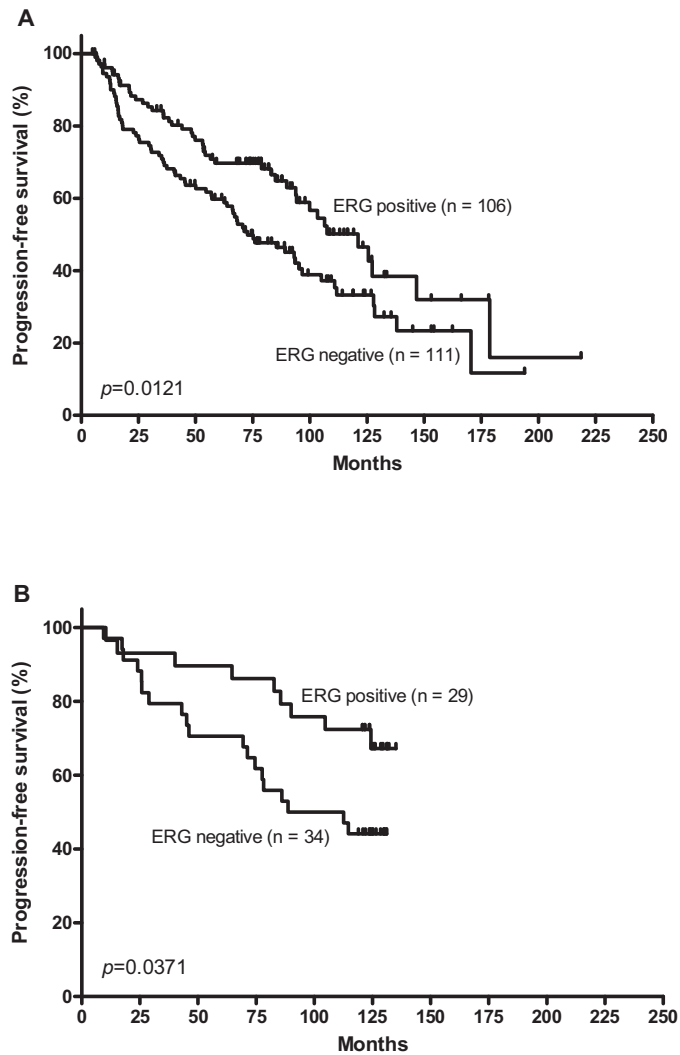

**Supplementary Figure 3.** Regression-tree analysis of prognostic markers in the prostatectomy cohort. The factor used in each level splits the patients into distinct survival groups according to a Cox-regression model. The number of patients in each group are indicated. The circles show the 5-year progression-free survival fraction for each group. Sample numbers in each subgroup represent informative cases where no clinical data was missing.

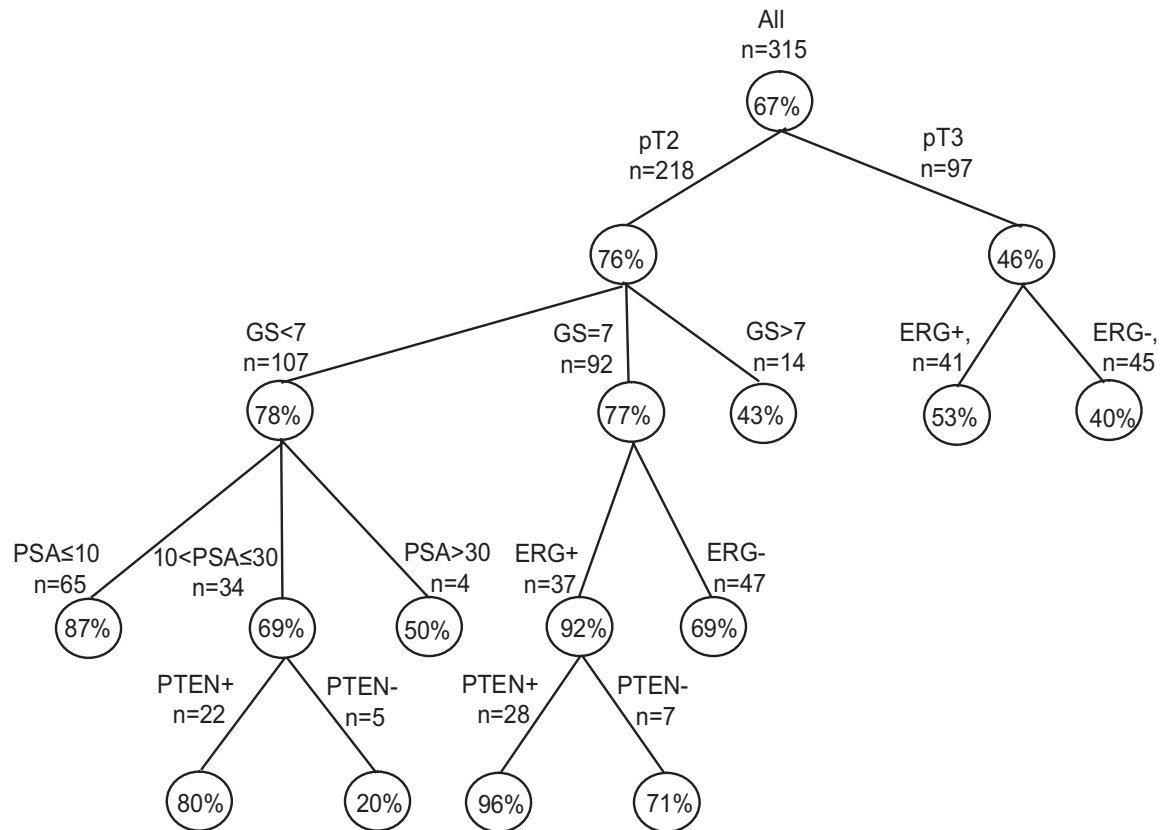

**Supplementary Figure 4.** Kaplan-Meier analysis of progression-free survival of prostatectomy-treated patients according to SPINK1 expression in ERG negative patients.

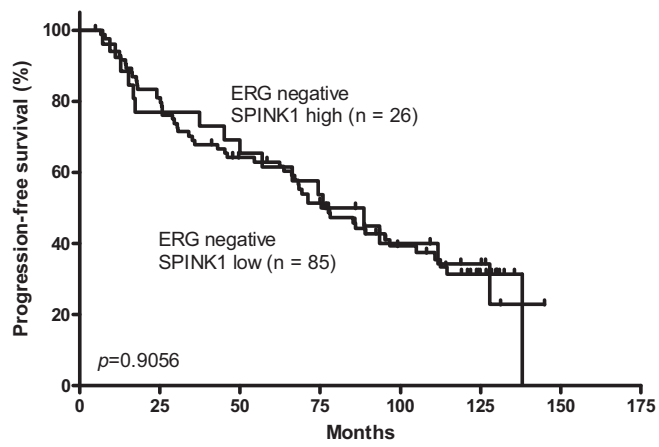

**Supplementary Figure 5.** FISH analyses of (A-B) *TP53* and (C-D) 3p14 deletion. (A-B) The signals are red for *TP53* and green for centromere 17. (A) Normal *TP53* locus, (B) deletion of *TP53*. (C-D) The signals are red (telomeric) and green (centromeric) for regions around the 3p14 region, and blue for 3p14 region. (C) Normal 3p14 locus, (D) deletion of 3p14 region.

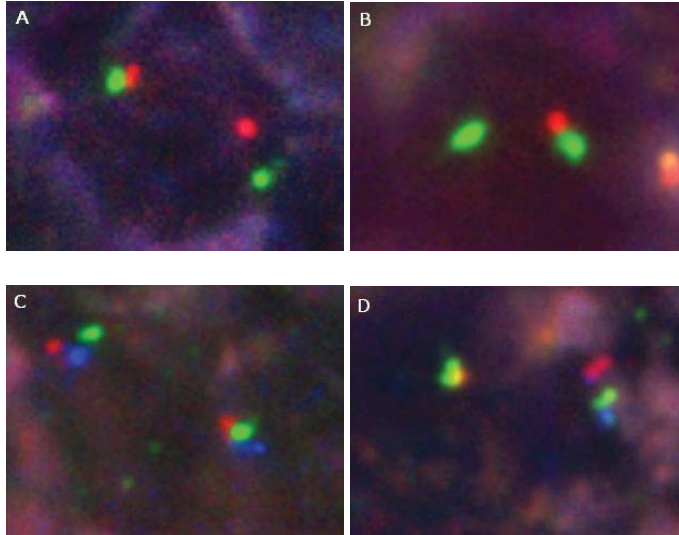

**Supplementary Figure 6.** Kaplan-Meier analysis of progression-free survival of endocrine-treated patients according to ERG expression.

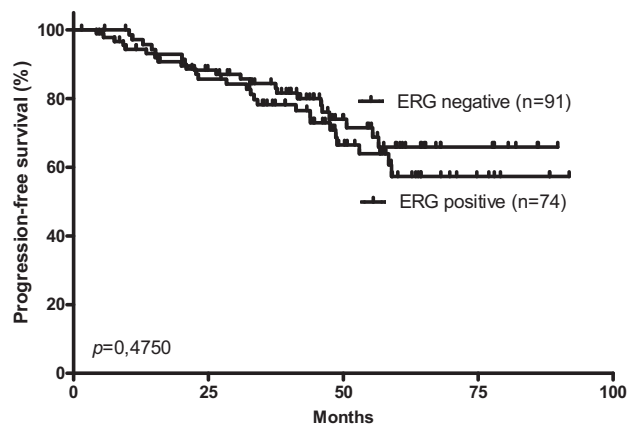

Type of file: table

Label: Supplemental data

Filename: tabs\_1\_to\_11.pdf



## Loss of PTEN is associated with aggressive behavior in ERG positive prostate cancer

Katri A. Leinonen *et al.*

### SUPPLEMENTARY TABLES

**Supplementary Table 1.** The clinicopathological description of the prostatectomy, needle biopsy and locally recurrent CRPC samples.

|                                                       |                                               |
|-------------------------------------------------------|-----------------------------------------------|
| <u>Prostatectomy specimens, n</u>                     | 326                                           |
| Gleason score, n (%)                                  |                                               |
| <7                                                    | 126 (40)                                      |
| 7                                                     | 152 (48)                                      |
| >7                                                    | 39 (12)                                       |
| pT stage, n(%)                                        |                                               |
| pT2                                                   | 221 (69)                                      |
| pT3                                                   | 98 (31)                                       |
| Mean age at diagnosis                                 | 63.0 years (median 63.0, range 44.0-74.0 yrs) |
| Median follow-up time                                 | 76.1 months (range 4.9-218.7 mo)              |
| <u>Needle biopsy specimens, n</u>                     | 166                                           |
| Gleason score, n (%)                                  |                                               |
| <7                                                    | 52 (28)                                       |
| 7                                                     | 55 (29)                                       |
| >7                                                    | 81 (43)                                       |
| T-stage, n (%)                                        |                                               |
| T1-2                                                  | 116 (59)                                      |
| T3-4                                                  | 80 (41)                                       |
| M-stage, n (%)                                        |                                               |
| MX                                                    | 101 (52)                                      |
| M0                                                    | 69 (35)                                       |
| M1                                                    | 26 (13)                                       |
| Mean age at diagnosis                                 | 73.6 years (median 74.3, range 52.7-88.8 yrs) |
| <u>Locally recurrent CRPCs, n</u>                     | 177                                           |
| Mean time from the beginning of treatment to the TURP | 46.7 months (range 1.0-187.0 mo)              |
| Endocrine treatment used:                             |                                               |
| Orchiectomy                                           | 80 cases                                      |
| Luteinizing hormone-releasing hormone (LHRH) analogue | 51 cases                                      |
| Estrogen                                              | 5 cases                                       |
| Bicalutamide alone                                    | 1 case                                        |
| Orchiectomy + estrogen                                | 3 cases                                       |
| Maximal androgen blockade                             | 29 cases                                      |
| Maximal androgen blockade + estramustine              | 1 case                                        |

**Supplementary Table 2.** List of metastasized CRPC samples studied in each study subject in IHC stainings.

| <b>PELICAN<br/>Autopsy<br/>Study Case<br/>Number (A)</b> | <b>Subject Race,<br/>Ethnicity</b>  | <b>Sample Name</b>                                                                              |
|----------------------------------------------------------|-------------------------------------|-------------------------------------------------------------------------------------------------|
| 1                                                        | White,<br>Nonhispanic               | Subdural Met, Seminal vesicle Met, Cranial Bone Met                                             |
| 2                                                        | White,<br>Nonhispanic               | Liver Met, Spleen Met, Adrenal Met, Chest Wall Met                                              |
| 3                                                        | African<br>American,<br>Nonhispanic | Subdural Met, Bladder Met, Thoracic Paraaortic LN Met, R<br>Rib Met, Pericardium Met            |
| 4                                                        | White,<br>Nonhispanic               | Liver Met, Rib Met, Abdominal Paraaortic LN Met, Pelvic LN<br>Met                               |
| 5                                                        | White,<br>Nonhispanic               | L Iliac LN Met, Manubrium Met, Pelvic LN Met, L Retro<br>Paritoneal Mass Met                    |
| 7                                                        | White,<br>Nonhispanic               | Paraaortic LN Met, Liver Met                                                                    |
| 8                                                        | White,<br>Nonhispanic               | Liver Met, R Rib 8 Met, R Inguinal LN Met, Pelvic LN Met                                        |
| 9                                                        | White,<br>Nonhispanic               | Periportal LN Met, Hilar LN Met, Lung Met, L Pelvic LN Met                                      |
| 10                                                       | African<br>American,<br>Nonhispanic | R Iliac LN Mets, Perigastric LN Met, Periportal LN Met                                          |
| 11                                                       | White,<br>Nonhispanic               | L Inguinal LN Met, R Pelvic LN Mets, Bladder Met,<br>Mediastinal LN Met                         |
| 12                                                       | African<br>American,<br>Nonhispanic | Paraaortic LN Met, Mediastinal LN Met, L Pelvic LN Met,<br>Retroperitoneal LN Met               |
| 13                                                       | White,<br>Nonhispanic               | Paraaortic LN Met, L3 Met, T6 Met                                                               |
| 14                                                       | White,<br>Nonhispanic               | Liver Met, Thoracic Paraaortic LN Met, R Axillary LN Met, L<br>Subclavian LN Met, R Adrenal Met |
| 15                                                       | White,<br>Nonhispanic               | Liver Met, R Adrenal Met, Humerus Marrow Met                                                    |
| 16                                                       | White,<br>Nonhispanic               | Pericardial Mets, L Hilar LN Met, R Temporal Subdural Met,<br>Abdominal Paraaortic LN Met       |

|    |                                     |                                                                                                                           |
|----|-------------------------------------|---------------------------------------------------------------------------------------------------------------------------|
| 17 | White,<br>Nonhispanic               | Abdominal Paraaortic LN Met, Subdural Met, R Femur Marrow Met, R Iliac LN Met, L Axillary LN Met                          |
| 18 | White,<br>Nonhispanic               | L Cervical LN Met, Supraclavicular LN Met                                                                                 |
| 19 | White,<br>Nonhispanic               | Paraaortic LN Met, L Axillary LN Met, Subdural Met                                                                        |
| 20 | African<br>American,<br>Nonhispanic | Seminal Vesicle Met, Left Upper Lung Met                                                                                  |
| 21 | White,<br>Nonhispanic               | Multiple Liver Met, L Clavicular LN Met, Rib Met, Left Rib 5 Mass Met                                                     |
| 22 | White, Hispanic                     | R pelvic LN Mets, L Periaortic LN Met, R Adrenal Met, Seminal Vesicle Met                                                 |
| 23 | African<br>American,<br>Nonhispanic | Liver Met, Periaortic Soft Tissue Met, R Adrenal Met                                                                      |
| 24 | White,<br>Nonhispanic               | R Axillary LN Met, Pericardial Met, R Diaphragmatic Mass Met                                                              |
| 25 | White,<br>Nonhispanic               | R Femur Met, L Seminal Vesicle Met                                                                                        |
| 26 | White,<br>Nonhispanic               | L Rib 5 Met                                                                                                               |
| 27 | White,<br>Nonhispanic               | R Axillary LN Met, Seminal Vesicle Met, T7 Met                                                                            |
| 28 | White,<br>Nonhispanic               | Bladder Met, R Lung Met, Anterior Mediastinal LN Met, Hilar LN Met                                                        |
| 29 | White,<br>Nonhispanic               | Cerebellum Met, R Superficial Inguinal LN Met                                                                             |
| 30 | White,<br>Nonhispanic               | R Femur Marrow Met, R Humerus Marrow Met, L Lobe Liver Single Met, R Adrenal Met, Hilar LN Met                            |
| 31 | White,<br>Nonhispanic               | L Adrenal Met, R Subdural Met, L Inguinal LN Met, R Inguinal LN Met, Pelvic LN Met                                        |
| 32 | White,<br>Nonhispanic               | L Subclavicular LN Met, R Rib 8 Soft Met, L Inferior Paraaortic LN Met, Superior Abdominal LN Met, R Subclavicular LN Met |
| 33 | White,<br>Nonhispanic               | L Axillary LN Met, L Subdural Met, L Periadrenal Met, Paratracheal LN Met, Perigastric LN Met                             |

**Supplementary Table 3.** List of metastasized CRPC samples studied in each study subject in *TP53* mutation analysis.

| <b>PELICAN<br/>Autopsy<br/>Study Case<br/>Number (A)</b> | <b>Subject Race,<br/>Ethnicity</b>  | <b>Cancerous Tissues Studied,<br/>Sample Name</b>                                     | <b>Noncancerous<br/>tissue<br/>Studied</b> |
|----------------------------------------------------------|-------------------------------------|---------------------------------------------------------------------------------------|--------------------------------------------|
| 1                                                        | White,<br>Nonhispanic               | Bladder Met, L Seminal Vesicle Met,<br>Epidural Met                                   | Liver                                      |
| 2                                                        | White,<br>Nonhispanic               | Spleen Met, Single Liver Met C1, Liver<br>Met, Rib 6 Met                              | Kidney                                     |
| 3                                                        | African<br>American,<br>Nonhispanic | Pelvic Paraaortic LN Met, Subdural Met,<br>Vertebral Bone S2 Met                      | Lymphs                                     |
| 4                                                        | White,<br>Nonhispanic               | Vertebral Bone Met, Rib Met, Liver Met 8,<br>Liver Met 17                             | Transformed<br>Lymphs                      |
| 5                                                        | White,<br>Nonhispanic               | L Iliac LN Met, L Humerus Met, Soft<br>Manubrium Mass Met                             | Spleen                                     |
| 7                                                        | White,<br>Nonhispanic               | P meta-aortic LN Met, Prostate CA, R<br>Posterior Subdural Met                        | Liver                                      |
| 8                                                        | White,<br>Nonhispanic               | Multiple Liver Mets, R Inguinal LN Met, R<br>Adrenal Met                              | Kidney                                     |
| 9                                                        | White,<br>Nonhispanic               | L Supraclavicular LN Met, Pulmonary Hilar<br>LN Met, Periportal LN Met                | Liver                                      |
| 10                                                       | African<br>American,<br>Nonhispanic | R Iliac LN Met, Perigastric LN Met,<br>Prostate CA                                    | Liver                                      |
| 11                                                       | White,<br>Nonhispanic               | Bladder Neck Met, R Pelvic LN Met, L<br>Inguinal LN Met                               | Liver                                      |
| 12                                                       | African<br>American,<br>Nonhispanic | R Pelvic LN Met, Paraaortic LN Met,<br>Mediastinal LN Met                             | Liver                                      |
| 13                                                       | White,<br>Nonhispanic               | R Iliac LN Met, Paraaortic LN Met,<br>Vertebral L4 Bone Met, Vertebral S2 Bone<br>Met | Liver                                      |
| 14                                                       | White,<br>Nonhispanic               | R Axillary LN Met, Thoracic paraaortic LN<br>Met, Liver Met                           | Liver                                      |
| 15                                                       | White,<br>Nonhispanic               | Liver Met, R Rib 10 Bone Met, R Adrenal<br>Met                                        | Liver                                      |
| 16                                                       | White,<br>Nonhispanic               | L Pulmonary Hilar LN Met, R Tempora<br>Subdural Met, Pericardial Mets                 | Liver                                      |

|    |                                     |                                                                                                                                                                    |        |
|----|-------------------------------------|--------------------------------------------------------------------------------------------------------------------------------------------------------------------|--------|
| 17 | White,<br>Nonhispanic               | Subdural Met Fossa C, Subdural Tumor met, R Femur Marrow Met, R Iliac LN Met, Paraaortic LN Met, R Supraclavicular LN Met, L Humerus Marrow Met, L Inguinal LN Met | Kidney |
| 18 | White,<br>Nonhispanic               | L Cervical LN Met 2, L Cervical LN Met 4, L Supraclavicular LN met                                                                                                 | Kidney |
| 19 | White,<br>Nonhispanic               | L Axillary LN Met, L Pelvic LN Met, Paraaortic LN Met                                                                                                              | Liver  |
| 20 | African<br>American,<br>Nonhispanic | R Mid Prostate CA, Seminal Vesicle Met, L Upper Lung Met                                                                                                           | Liver  |
| 21 | White,<br>Nonhispanic               | L Clavicular LN Met, Multiple Liver Mets, Single Liver Met #2, Single Liver Met #4                                                                                 | Kidney |
| 22 | White, Hispanic                     | R Adrenal Met, R Pelvic LN Met, L Periaortic LN Met, L Humerus Bone Marrow Met, Tumor Around Seminal Vesicle #2 Met                                                | Liver  |
| 23 | African<br>American,<br>Nonhispanic | Single Liver Met, R Periaortic Met, R Adrenal Met, Vertebral T9 Bone Met                                                                                           | Spleen |
| 24 | White,<br>Nonhispanic               | R Axillary LN Met, R Diaphragmatic Met, Pericardial Met, Xiphoid Met                                                                                               | Spleen |
| 25 | White,<br>Nonhispanic               | Prostate CA, R Femur Marrow Met, R Femur Bone Met                                                                                                                  | Liver  |
| 26 | White,<br>Nonhispanic               | Vertebral L4 Hemorrhagic Bone Met, Bladder Met, Vertebral T9 Bone Met, Peribronchial LN Met                                                                        | Spleen |
| 27 | White,<br>Nonhispanic               | Prostate CA, R Axillary LN Met, L Clavicle Met                                                                                                                     | Liver  |
| 28 | White,<br>Nonhispanic               | Posterior Bladder Polypoid Met, Anterior Mediastinal LN Met, R Lower Lung Met                                                                                      | Liver  |
| 29 | White,<br>Nonhispanic               | R Inguinal LN Met, Prostate CA, Intraparenchymal Cerebellum Met                                                                                                    | Liver  |
| 30 | White,<br>Nonhispanic               | Liver Left Lobe Single Met, R Femur Marrow Met, R Humerus Marrow Met                                                                                               | Spleen |
| 31 | White,<br>Nonhispanic               | Prostate CA, L Adrenal Met, R Subdural Met                                                                                                                         | Liver  |
| 32 | White,<br>Nonhispanic               | L Subclavicular LN Met, Prostate CA, R Rib 8 Bone Met                                                                                                              | Spleen |

|    |                       |                                                         |       |
|----|-----------------------|---------------------------------------------------------|-------|
| 33 | White,<br>Nonhispanic | L Axillary LN Met, L Subdural Met, L<br>Periadrenal Met | Liver |
|----|-----------------------|---------------------------------------------------------|-------|

**Supplementary Table 4.** Criteria for IHC stainings. ERG, AR, PTEN and SPINK1 intensities were evaluated from 0 to 3.

|        | Negative | Low Expression | High Expression | Positive/Strong |
|--------|----------|----------------|-----------------|-----------------|
| ERG    | 0        | -              | -               | 1-3             |
| AR     | 0        | 0-1            | 2-3             | -               |
| PTEN   | 0        | 0-1            | -               | 1-3             |
| SPINK1 | 0        | 0-2            | -               | 3               |

**Supplementary Table 5.** Primers used for TP53 sequencing.

| Primer   |                                                                       |
|----------|-----------------------------------------------------------------------|
| Exon 4   | 5'-GGC TGA GGA CCT GGT CCT-3'<br>5'-ATA CGG CCA GGC ATT GAA GTC TC-3' |
| Exon 5-6 | 5'-TTC TTT GCT GCC GTG TTC C-3'<br>5'-ACA ACC ACC CTT AAC CCC TC-3'   |
| Exon 7   | 5'-CCA CAG GTC TCC CCA AGG-3'<br>5'-AAA TCG GTA AGA GGT GGG C-3'      |
| Exon 8-9 | 5'-TGG GAG TAG ATG GAG CCT GGT-3'<br>5'-GAG CCA TTG TCT TTG AGG CA-3' |

**Supplementary Table 6.** Primers used for SSCP.

| Primer   |                                                                     |
|----------|---------------------------------------------------------------------|
| exon 5   | 5'-AAT CAG TGA GGA ATC AGA GGC-3'                                   |
| intron 5 | 5'-TTC TTT GCT GCC GTG TTC C-3'<br>5'-ACA ACC ACC CTT AAC CCC TC-3' |
| exon 6   | 5'-AGG CCT CTG ATT CCT CAC TG-3'                                    |
| exon 8   | 5'-GTG AAT CTG AGG CAT AAC TGC-3'                                   |
| exon 9   | 5'-CAG ATT CAC TTT TAT CAC C-3'                                     |

**Supplementary Table 7.** Association between ERG expression according to IHC and *TMPRSS2:ERG* fusion according to FISH in prostatectomy and locally recurrent CRPC samples.

| <i>TMPRSS2:ERG</i> fusion | ERG expression  |                 |
|---------------------------|-----------------|-----------------|
|                           | Negative, n (%) | Positive, n (%) |
| No                        | 138 (98)        | 56 (39)         |
| Yes                       | 3 (2)           | 87 (61)         |

$p < 0.0001$ , Fisher's exact test.

**Supplementary Table 8.** The effect of use of PSA on ERG positivity rate in prostatectomy samples.

| Prostatectomy samples       | ERG expression, n (%) |          |
|-----------------------------|-----------------------|----------|
|                             | Negative              | Positive |
| Before PSA-era              | 6 (55)                | 5 (45)   |
| PSA tests done occasionally | 24 (53)               | 21 (47)  |
| Routine PSA use             | 120 (52)              | 111 (48) |

**Supplementary Table 9.** Association between *TP53* deletion and PTEN expression in prostatectomy, locally recurrent and metastasized CRPC samples.

| PTEN expression          | <i>TP53</i> deletion |                 | $P^a$  |
|--------------------------|----------------------|-----------------|--------|
|                          | No deletion, n (%)   | Deletion, n (%) |        |
| Prostatectomy samples:   |                      |                 |        |
| Negative                 | 26 (13)              | 6 (35)          | 0.0281 |
| Positive                 | 167 (87)             | 11 (65)         |        |
| Locally recurrent CRPCs: |                      |                 |        |
| Negative                 | 38 (48)              | 8 (40)          | 0.6188 |
| Positive                 | 41 (52)              | 12 (60)         |        |
| Metastasized CRPCs:      |                      |                 |        |
| Negative                 | 11 (69)              | 1 (50)          | 1.0000 |
| Positive                 | 5 (31)               | 1 (50)          |        |

<sup>a</sup>Fisher's Exact Test

**Supplementary Table 10.** Details of *TP53* mutations found from metastasized CRPC samples. A total of 14 *TP53* mutations were identified. Identical *TP53* mutation was found in each metastatic cancer samples studied in 12 of 13 (92%) subjects. No mutation was found in noncancerous control samples studied in parallel from each subject. Substitution (Subst), deletion (del), insertion (ins), exon (ex), intron (intr), frame shift (fs), stop codon (X).

| Case Number | Sample Name                                                                             | Subject race, ethnicity             | TP53 mutation |              |                 |                      |
|-------------|-----------------------------------------------------------------------------------------|-------------------------------------|---------------|--------------|-----------------|----------------------|
|             |                                                                                         |                                     | Type          | Exon /intron | cDNA            | Protein              |
| A1          | Bladder Met<br>L Seminal Vesicle Met<br>Epidural Met                                    | White,<br>Nonhispanic               | Subst         | Ex 8         | 818 G>A         | R273H                |
| A3          | Pelvic Paraaortic LN Met<br>Subdural Met<br>Vertebral Bone S2 Met                       | African<br>American,<br>Nonhispanic | Subst         | Ex 8         | 827 C>A         | A276D                |
| A4          | Vertebral Bone Met<br>Rib Met<br>Liver Met 8<br>Liver Met 17                            | White,<br>Nonhispanic               | Subst         | Ex 5         | 473 G>T         | R158L                |
| A5          | L Humerus Met<br>L Iliac LN Met<br>Soft Manubrium Mass<br>Met                           | White,<br>Nonhispanic               | No mut        | -            | -               | -                    |
|             |                                                                                         |                                     | Del           | Intr 5       | -               | -                    |
| A7          | Paraortic LN Met<br>Prostate CA<br>R Posterior Subdural Met                             | White,<br>Nonhispanic               | Subst         | Ex 4         | 314 G>T         | G105V                |
|             |                                                                                         |                                     | Ins           | Ex 7         | 713-<br>714insT | C238ins.fs.          |
| A12         | R Pelvic LN Met<br>Paraortic LN Met<br>Mediastinal LN Met                               | African<br>American,<br>Nonhispanic | Ins           | Ex 7         | 713-<br>714insT | C238ins.fs.          |
| A14         | R Axillary LN Met<br>Thoracic paraortic LN<br>Met<br>Liver Met                          | White,<br>Nonhispanic               | Subst         | Ex 6         | 574             | Q192X                |
| A16         | L Pulmonary Hilar LN<br>Met<br>R Temporal Subdural Met<br>Pericardial Mets              | White,<br>Nonhispanic               | Del           | Ex 6         | 575-<br>588del. | Q192-<br>R196del.fs. |
| A18         | L Cervical LN Met 2<br>L Cervical LN Met 4<br>L Supraclavicular LN Met                  | White,<br>Nonhispanic               | Subst         | Ex 6         | 637 C>T         | R213X                |
| A24         | R Axillary LN Met<br>R Diaphragmatic Met<br>Xiphoid Met                                 | White,<br>Nonhispanic               | Del           | Ex 6         | 625-<br>626del. | R209del. fs.         |
| A28         | Posterior Bladder<br>Polypoid Met<br>Anterior Mediastinal LN<br>Met<br>R Lower Lung Met | White,<br>Nonhispanic               | Subst         | Ex 8         | 817 C>T         | R273C                |
| A30         | Liver Left Lobe Single<br>Met<br>R Femur Marrow Met<br>R Humerus Marrow Met             | White,<br>Nonhispanic               | Subst         | Ex 5         | 535 C>T         | H179Y                |
| A32         | L Subclavicular LN Met                                                                  | White,                              | Subst         | Ex 5         | 396 G>T         | K132N                |



|                                |             |
|--------------------------------|-------------|
| R Rib8 Bone Met<br>Prostate CA | Nonhispanic |
|--------------------------------|-------------|

**Supplementary Table 11.** Association of ERG negative and positive subjects with mutation or deletion of *TP53* in CRPC metastases.

| TP53 change<br>(mutation or<br>deletion) | ERG expression |                |
|------------------------------------------|----------------|----------------|
|                                          | Negative, n(%) | Positive, n(%) |
| No                                       | 13 (72)        | 5 (36)         |
| Yes                                      | 5 (28)         | 9 (64)         |
| <i>p</i> =0.0720, Fisher's Exact Test    |                |                |
